# Supplementary material for: Values of Integrated Care: A Systematic Review
Source: PubMed Central journal article supplement (PMC6251066; doi:10.5334/ijic.4172), 2018-11-15
Supplement: ijic-18-4-4172-s1.pdf [file ijic-18-4-4172-s1.pdf]

**Appendix 1: Search strategies.**

**Table 3: Search strategy 1.**

|                                                                                                                             |     |                                                                                                                                                                                                                                                                                                                                                                 |     |                                                                                                                        |     |                                                                                                                                                                                                                                       |
|-----------------------------------------------------------------------------------------------------------------------------|-----|-----------------------------------------------------------------------------------------------------------------------------------------------------------------------------------------------------------------------------------------------------------------------------------------------------------------------------------------------------------------|-----|------------------------------------------------------------------------------------------------------------------------|-----|---------------------------------------------------------------------------------------------------------------------------------------------------------------------------------------------------------------------------------------|
| [Title]<br>values OR<br>principles<br>OR<br>fundament*<br>OR key<br>beliefs OR<br>philosophy<br>OR theor*<br>OR<br>concept* | AND | [Title] person<br>centered OR person<br>centred OR patient<br>centered OR patient<br>centred OR people<br>centered OR people<br>centred OR client<br>centered OR client<br>centred OR integrat*<br>OR coordination OR<br>interprofessional OR<br>interorganizational<br>OR<br>interorganisational<br>OR interdisciplinary<br>OR collaboration OR<br>cooperation | AND | [Title] care<br>OR<br>healthcare<br>OR health<br>services OR<br>health<br>delivery OR<br>health<br>service<br>delivery | NOT | [Title]<br>laboratory<br>OR dental<br>OR oncology<br>OR surgery<br>OR surgical<br>OR<br>pharmacy<br>OR catholic<br>OR radiology<br>OR<br>biomedical<br>OR software<br>OR<br>electronic<br>OR<br>information<br>system OR<br>algorithm |
|-----------------------------------------------------------------------------------------------------------------------------|-----|-----------------------------------------------------------------------------------------------------------------------------------------------------------------------------------------------------------------------------------------------------------------------------------------------------------------------------------------------------------------|-----|------------------------------------------------------------------------------------------------------------------------|-----|---------------------------------------------------------------------------------------------------------------------------------------------------------------------------------------------------------------------------------------|

**Table 4: Search strategy 2.**

|                                                                         |     |                                                                                                                                                                                                                                                                                                                                                                             |     |                                                                                                                     |     |                                                                                                                                                                                                                                          |
|-------------------------------------------------------------------------|-----|-----------------------------------------------------------------------------------------------------------------------------------------------------------------------------------------------------------------------------------------------------------------------------------------------------------------------------------------------------------------------------|-----|---------------------------------------------------------------------------------------------------------------------|-----|------------------------------------------------------------------------------------------------------------------------------------------------------------------------------------------------------------------------------------------|
| [Title/Abstract]<br>model OR<br>models OR<br>framework OR<br>frameworks | AND | [Title/Abstract] person centered OR<br>person centred OR<br>patient centered<br>OR patient centred<br>OR people centered<br>OR people centred<br>OR client centered<br>OR client centred<br>OR integrat* OR<br>coordination OR<br>interprofessional<br>OR<br>interorganizational<br>OR<br>interorganisational<br>OR interdisciplinary<br>OR collaboration OR<br>cooperation | AND | [Title] care OR<br>healthcare<br>OR health<br>services<br>OR health<br>delivery<br>OR health<br>service<br>delivery | NOT | [Title]<br>laboratory<br>OR dental<br>OR oncology<br>OR surgery<br>OR surgical<br>OR<br>pharmacy<br>OR catholic<br>OR<br>radiology<br>OR<br>biomedical<br>OR software<br>OR<br>electronic<br>OR<br>information<br>system OR<br>algorithm |
|-------------------------------------------------------------------------|-----|-----------------------------------------------------------------------------------------------------------------------------------------------------------------------------------------------------------------------------------------------------------------------------------------------------------------------------------------------------------------------------|-----|---------------------------------------------------------------------------------------------------------------------|-----|------------------------------------------------------------------------------------------------------------------------------------------------------------------------------------------------------------------------------------------|

\* [MeSH Major Topic] Models, Organizational
